# Supplementary material
Source: PubMed Central journal article supplement (PMC6583550)
Supplement: jamaophthalmol-e174859-s001.pdf [file jamaophthalmol-e174859-s001.pdf]

## Supplementary Online Content

Rim JH, Lee S-T, Gee HY, et al. Accuracy of next-generation sequencing for molecular diagnosis in patients with infantile nystagmus syndrome. *JAMA Ophthalmol*. Published online November 16, 2017.  
doi:10.1001/jamaophthalmol.2017.4859

**eTable 1.** Target Genes Associated With Infantile Nystagmus Syndrome

**eTable 2.** Quality Control Matrices of Next-Generation Sequencing Results for all Patients in This Study

**eTable 3.** The Clinical Features of Patients Who Had 2 Pathogenic Variants With No Segregation Analysis

**eTable 4.** Pathogenic or Likely Pathogenic Variants in 4 Patients Who Had Compound Heterozygous Mutations With No Segregation Analysis

**eTable 5.** The Clinical Features of Patients With Infantile Nystagmus Syndrome Who Had Only 1 Putative Pathogenic Variant Or No Pathogenic Variant

**eAppendix.** Annotation, Interpretation of Variants, Phenotype Review, and Consensus Discussion

**eFigure 1.** Schematic Diagram of Next-Generation Sequencing Analysis Work Flow

**eFigure 2.** Pedigree of 8 Patients Who Had Family History of Nystagmus

**eFigure 3.** The Distribution of Age at Referral for Genetic Testing

**eFigure 4.** Wide-Field Fundus Photograph and Optical Coherence Tomography in a Patient With *RPGRIP1* Mutations

**eFigure 5.** Fundus Photograph and Optical Coherence Tomography in a Patient With *CRB1* Mutations

**eFigure 6.** Fundus Photograph, Optical Coherence Tomography, Ultrasonogram of the Kidney, and Abdominal Computed Tomography in a Patient With Senior-Loken Syndrome Caused by Homozygous p.Arg1178Glu *WDR19* Mutation

**eFigure 7.** Phenotypic Variability of 4 Patients With *GPR143* Mutations

**eFigure 8.** *In silico* Prediction of Intronic Mutation Within *GPR143* Intron 5

**eFigure 9.** Fundus Photographs and Optical Coherence Tomography in 4 Patients With *PAX6* Mutations

**eFigure 10.** Fundus Photograph and Electroretinogram in a Patient With *CACNA1F* Mutation

This supplementary material has been provided by the authors to give readers additional information about their work.

**eTable 1.** Target Genes Associated With Infantile Nystagmus Syndrome

| Gene HGNC       | Disease/Phenotype                                             | OMIM Phenotype ID | Gene ID (OMIM#/GC) |
|-----------------|---------------------------------------------------------------|-------------------|--------------------|
| <i>ABCA4</i>    | Stargardt disease 1                                           | 248200            | 601691             |
| <i>ADAM9</i>    | Cone-rod dystrophy 9                                          | 612775            | 602713             |
| <i>ADAMTS18</i> | Microcornea, chorioretinal atrophy, and telecanthus           | 615458            | 607512             |
| <i>AHI1</i>     | Joubert syndrome 3                                            | 608629            | 608894             |
| <i>AIP1</i>     | Cone-rod dystrophy, Leber congenital amaurosis 4, RP juvenile | 604393            | 604392             |
| <i>ALMS1</i>    | Alstrom syndrome                                              | 203800            | 606844             |
| <i>ARL13B</i>   | Joubert syndrome 8                                            | 612291            | 608922             |
| <i>ATF6</i>     | Achromatopsia 7                                               | 616517            | 605537             |
| <i>ATXN7</i>    | Spinocerebellar ataxia 7                                      | 164500            | 607640             |
| <i>BEST1</i>    | Bestrophinopathy, autosomal recessive                         | 611809            | 607854             |
| <i>C10orf11</i> | Albinism, oculocutaneous, type VII                            | 615179            | 614537             |
| <i>C1QTNF5</i>  | Retinal degeneration, late-onset, autosomal dominant          | 605670            | 608752             |
| <i>C21orf2</i>  | Axial Spondylometaphyseal dysplasia                           | -                 | -                  |
| <i>C5orf42</i>  | Joubert syndrome 17                                           | 614615            | 614571             |
| <i>C8orf37</i>  | Cone-rod dystrophy 16, RP 64                                  | 614500            | 614477             |
| <i>CABP4</i>    | Cone-rod synaptic disorder, congenital nonprogressive         | 610427            | 608965             |
| <i>CACNA1F</i>  | Night blindness, congenital stationary (incomplete), 2A       | 300071            | 300110             |
| <i>CACNA2D4</i> | Retinal cone dystrophy 4                                      | 610478            | 608171             |
| <i>CAPN5</i>    | Vitreoretinopathy, neovascular inflammatory                   | 193235            | 602537             |
| <i>CC2D2A</i>   | COACH syndrome                                                | 216360            | 612013             |
| <i>CDH3</i>     | Hypotrichosis, congenital, with juvenile macular dystrophy    | 601553            | 114021             |
| <i>CDHR1</i>    | Cone-rod dystrophy 15, RP 65                                  | 613660            | 609502             |
| <i>CEP290</i>   | Leber congenital amaurosis 10,                                | 611755            | 610142             |
| <i>CEP41</i>    | Joubert syndrome 15                                           | 614464            | 610523             |
| <i>CERKL</i>    | RP 26                                                         | 608380            | 608381             |
| <i>CFH</i>      | Macular degeneration, age-related, 4                          | 610698            | 134370             |
| <i>CHM</i>      | Choroideremia                                                 | 303100            | 300390             |
| <i>CNGA3</i>    | Achromatopsia 2                                               | 216900            | 600053             |
| <i>CNGB3</i>    | Achromatopsia 3                                               | 262300            | 605080             |
| <i>CNNM4</i>    | Jalili syndrome                                               | 217080            | 607850             |
| <i>COL11A1</i>  | Stickler syndrome, type II                                    | 604841            | 120280             |
| <i>COL11A2</i>  | Stickler syndrome, type III                                   | 184840            | 120290             |

|                |                                                            |        |        |
|----------------|------------------------------------------------------------|--------|--------|
| <i>COL2A1</i>  | Stickler syndrome, type 1                                  | 108300 | 120140 |
| <i>CRB1</i>    | Leber congenital amaurosis 8                               | 613835 | 604210 |
| <i>CRX</i>     | Leber congenital amaurosis 7                               | 613829 | 602225 |
| <i>CSPP1</i>   | Joubert syndrome 21                                        | 615636 | 611654 |
| <i>CYP27A1</i> | Cerebrotendinous xanthomatosis                             | 213700 | 606530 |
| <i>DRAM2</i>   | Cone-rod dystrophy 21                                      | 616502 | 613360 |
| <i>DTHD1</i>   | Leber congenital amaurosis                                 | -      | 616979 |
| <i>EFEMP1</i>  | Doyme honeycomb degeneration of retina                     | 126600 | 601548 |
| <i>ELOVL4</i>  | Stargardt disease 3                                        | 600110 | 605512 |
| <i>FRMD7</i>   | Nystagmus 1, congenital, X-linked                          | 310700 | 300628 |
| <i>FSCN2</i>   | RP 30                                                      | 607921 | 607643 |
| <i>FZD4</i>    | Exudative vitreoretinopathy 1                              | 133780 | 604579 |
| <i>GDF6</i>    | Leber congenital amaurosis 17                              | 615360 | 601147 |
| <i>GNAT2</i>   | Achromatopsia 4                                            | 613856 | 139340 |
| <i>GPR143</i>  | Ocular albinism, type I                                    | 300500 | 300808 |
| <i>GUCA1A</i>  | Cone-rod dystrophy 14                                      | 602093 | 600364 |
| <i>GUCA1B</i>  | RP 48                                                      | 613827 | 602275 |
| <i>GUCY2D</i>  | Leber congenital amaurosis 1                               | 204000 | 600179 |
| <i>HMCN1</i>   | Macular degeneration, age-related, 1                       | 603075 | 608548 |
| <i>IFT140</i>  | Short-rib thoracic dysplasia 9 with or without polydactyly | 266920 | 614620 |
| <i>IMPDH1</i>  | Leber congenital amaurosis 11                              | 613837 | 146690 |
| <i>IMPG1</i>   | Macular dystrophy, vitelliform, 4                          | 616151 | 602870 |
| <i>INPP5E</i>  | Joubert syndrome 1                                         | 213300 | 613037 |
| <i>IQCB1</i>   | Senior-Loken syndrome 5                                    | 609254 | 609237 |
| <i>JAG1</i>    | Alagille syndrome 1                                        | 118450 | 601920 |
| <i>KCNJ13</i>  | Leber congenital amaurosis 16                              | 614186 | 603208 |
| <i>KCNV2</i>   | Retinal cone dystrophy 3B                                  | 610356 | 607604 |
| <i>KIF7</i>    | Joubert syndrome 12                                        | 200990 | 611254 |
| <i>LCA5</i>    | Leber congenital amaurosis 5                               | 604537 | 611408 |
| <i>LRAT</i>    | Leber congenital amaurosis 14                              | 613341 | 604863 |
| <i>MFN2</i>    | Charcot-Marie-Tooth disease, axonal, type 2A2A             | 609260 | 608507 |
| <i>NDP</i>     | Norrie disease                                             | 310600 | 300658 |
| <i>NMNAT1</i>  | Leber congenital amaurosis 9                               | 608553 | 608700 |
| <i>NPHP1</i>   | Senior-Loken syndrome-1                                    | 266900 | 607100 |
| <i>OCA2</i>    | Albinism, oculocutaneous type II                           | 203200 | 611409 |

|                 |                                                                       |        |        |
|-----------------|-----------------------------------------------------------------------|--------|--------|
| <i>OFD1</i>     | Joubert syndrome 10                                                   | 300804 | 300170 |
| <i>OPA1</i>     | Optic atrophy 1                                                       | 165500 | 605290 |
| <i>OPA3</i>     | Optic atrophy 3 with cataract                                         | 165300 | 606580 |
| <i>OTX2</i>     | Retinal dystrophy, early-onset, with or without pituitary dysfunction | 610125 | 600037 |
| <i>PANK2</i>    | Neurodegeneration with brain iron accumulation 1                      | 234200 | 606157 |
| <i>PAX2</i>     | Papillorenal syndrome                                                 | 120330 | 167409 |
| <i>PAX6</i>     | Foveal hypoplasia 1                                                   | 136520 | 607108 |
| <i>PDE6C</i>    | Cone dystrophy 4                                                      | 613093 | 600827 |
| <i>PDE6H</i>    | Achromatopsia 6                                                       | 610024 | 601190 |
| <i>PITPNM3</i>  | Cone-rod dystrophy 5                                                  | 600977 | 608921 |
| <i>POC1B</i>    | Cone-rod dystrophy 20                                                 | 615973 | 614784 |
| <i>PRDM13</i>   | North Carolina macular dystrophy?                                     | -      | 616741 |
| <i>PROM1</i>    | Cone-rod dystrophy 12                                                 | 612657 | 604365 |
| <i>PRPH2</i>    | Leber congenital amaurosis 18                                         | 608133 | 179605 |
| <i>RAB28</i>    | Cone-rod dystrophy 18                                                 | 615374 | 612994 |
| <i>RAX2</i>     | Cone-rod dystrophy 11                                                 | 610381 | 610362 |
| <i>RD3</i>      | Leber congenital amaurosis 12                                         | 610612 | 180040 |
| <i>RDH12</i>    | Leber congenital amaurosis 13                                         | 612712 | 608830 |
| <i>RDH5</i>     | Fundus albitunctatus                                                  | 136880 | 601617 |
| <i>RGS9</i>     | Bradyopsia                                                            | 608415 | 604067 |
| <i>RGS9BP</i>   | Bradyopsia                                                            | 608415 | 607814 |
| <i>RIMS1</i>    | Cone-rod dystrophy 7                                                  | 603649 | 606629 |
| <i>RP1L1</i>    | Occult macular dystrophy                                              | 613587 | 608581 |
| <i>RPE65</i>    | Leber congenital amaurosis 2                                          | 204100 | 180069 |
| <i>RPGR</i>     | Cone-rod dystrophy, X-linked, 1                                       | 304020 | 312610 |
| <i>RPGRI1</i>   | Leber congenital amaurosis 6                                          | 613826 | 605446 |
| <i>RPGRI1L</i>  | Joubert syndrome 7                                                    | 611560 | 610937 |
| <i>SEMA4A</i>   | Cone-rod dystrophy 10                                                 | 610283 | 607292 |
| <i>SLC24A5</i>  | Albinism, oculocutaneous, type VI                                     | 113750 | 609802 |
| <i>SLC45A2</i>  | Albinism, oculocutaneous, type IV                                     | 606574 | 606202 |
| <i>SPATA7</i>   | Leber congenital amaurosis 3                                          | 604232 | 609868 |
| <i>TCTN3</i>    | Joubert syndrome 18                                                   | 614815 | 613847 |
| <i>TIMP3</i>    | Sorby fundus dystrophy                                                | 136900 | 188826 |
| <i>TMEM126A</i> | Optic atrophy 7                                                       | 612989 | 612988 |

|                |                                    |        |        |
|----------------|------------------------------------|--------|--------|
| <i>TMEM138</i> | Joubert syndrome 16                | 614465 | 614459 |
| <i>TMEM216</i> | Joubert syndrome 2                 | 608091 | 613277 |
| <i>TMEM231</i> | Joubert syndrome 20                | 614970 | 614949 |
| <i>TMEM237</i> | Joubert syndrome 14                | 614424 | 614423 |
| <i>TMEM67</i>  | COACH syndrome                     | 216360 | 609884 |
| <i>TTL5</i>    | Cone-rod dystrophy 19              | 615860 | 612268 |
| <i>TULP1</i>   | Leber congenital amaurosis 15      | 613843 | 602280 |
| <i>TYR</i>     | Albinism, oculocutaneous, type IA  | 203100 | 606933 |
| <i>TYRP1</i>   | Albinism, oculocutaneous, type III | 203290 | 115501 |
| <i>UNC119</i>  | ?Cone-rod dystrophy                | -      | 604011 |
| <i>WT1</i>     | Wilm's tumor, type I               | 194070 | 607102 |
| <i>ZNF423</i>  | Joubert syndrome 19                | 614844 | 604557 |

Table 1: Genes included in infantile nystagmus syndrome target enrichment. Listed are the genes included in the custom designed target enrichment along with the disease or phenotype associated with the gene according to Online Medelian Inheritance in Man (OMIM), OMIM phenotype identification number, and OMIM or Gene Cards gene identification number. Genes are named according HUGO Gene Nomenclature Committee (HUGO, <http://www.genenames.org/>) approved nomenclature.

**eTable 2.** Quality Control Matrices of Next-Generation Sequencing Results for all Patients In This Study

|                | <b>Total reads (bam)</b> | <b>Mapped reads (bp, %)</b> | <b>Average depth</b> | <b>Median inserted fragment (bp)</b> | <b>On target (%)</b> | <b>% Covered (&gt;X30)</b> |
|----------------|--------------------------|-----------------------------|----------------------|--------------------------------------|----------------------|----------------------------|
| Targeted panel | 8,484,605                | 8,262,418 (97.7%)           | 990.4x               | 213.3                                | 40.8                 | 99.7%                      |

**eTable 3.** The Clinical Features of Patients Who Had 2 Pathogenic Variants With No Segregation Analysis

| Patient No. | Initial Clinical Impression | Molecular diagnosis | Diagnosis After revisit | Sex | Age (years) | Nystagmus | Refraction |       | BCVA | Fundus           | Oculo Digital sign | ERG              | Additional phenotype |
|-------------|-----------------------------|---------------------|-------------------------|-----|-------------|-----------|------------|-------|------|------------------|--------------------|------------------|----------------------|
| 29          | LCA                         | <i>NMNAT1</i>       | LCA                     | F   | 1.75        | Roving    | +4.00      | +5.00 | NA   | Atrophic macula  | Y                  | extinguished     | N                    |
| 30          | IIN                         | <i>RPGRIP1</i>      | LCA                     | M   | 28.3        | HJ        | -6.50      | -6.50 | 0.05 | Slight pale disc | N                  | extinguished     | N                    |
| 31          | LCA                         | <i>CNGA3</i>        | ACHM                    | M   | 9.5         | HP        | +6.00      | +6.00 | 0.05 | Grossly normal   | N                  | Photopic: absent | N                    |
| 32          | ACHM                        | <i>CNGA3</i>        | ACHM                    | F   | 1.2         | HP        | +2.75      | +2.75 | NA   | Grossly normal   | N                  | Photopic: absent | N                    |

Abbreviations: ACHM, achromatopsia; BCVA, best-corrected visual acuity; ERG, electroretinography; F, female; HJ, horizontal jerk; HP, horizontal pendular; IIN, idiopathic infantile nystagmus; LCA, Leber congenital amaurosis; M, male; N, no; NA, not available; Y, yes

**eTable 4.** Pathogenic or Likely Pathogenic Variants in 4 Patients Who Had Compound Heterozygous Mutations With No Segregation Analysis

| Patient No. | Initial diagnosis | Gene    | Zygoty                | Mutations                                       | ExAC (MAF)          | In silico prediction (FATHMM) | Previous literatures                                   | Accession ID for transcript |
|-------------|-------------------|---------|-----------------------|-------------------------------------------------|---------------------|-------------------------------|--------------------------------------------------------|-----------------------------|
| 29          | LCA               | NMNAT1  | Compound heterozygous | c.196C>T: p.Arg66Trp<br>c.709C>T: p.Arg237Cys   | 0.00013<br>0.000074 | D (-6.60)<br>D (-4.67)        | Reference <sup>1,2</sup><br>Reference <sup>1,2,3</sup> | NM_022787.3                 |
| 30          | IIN               | RPGRIP1 | Compound heterozygous | c.2079C>G: p.Tyr693Ter<br>c.2009_2215+18del     | none<br>none        | NA<br>NA                      | Novel<br>Novel                                         | NM_020366.3                 |
| 31          | LCA               | CNGA3   | Compound Heterozygous | c.2T>A: p.Met1?<br>c.1001C>T: p.Ser334Phe       | none<br>none        | 0.97342<br>D (-4.80)          | Novel<br>Reference <sup>4</sup>                        | NM_001298.2                 |
| 32          | ACHM              | CNGA3   | Compound heterozygous | c.829C>T: p.Arg277Cys<br>c.1001C>T: p.Ser334Phe | 0.00012<br>none     | D (-5.78)<br>D (-4.80)        | Reference <sup>5-10</sup><br>Reference <sup>4</sup>    | NM_001298.2                 |

Abbreviations: ACHM, achromatopsia; D, damaging; ExAC, Exome Aggregation Consortium; FATHMM, Functional analysis through hidden Markov models; IIN, idiopathic infantile nystagmus; LCA, Leber congenital amaurosis; MAF, minor allele frequency  
P30 was previously reported. (Reference 11)

#### References for eTable4.

1. Falk MJ, Zhang Q, Nakamaru-Ogiso E, et al. NMNAT1 mutations cause Leber congenital amaurosis. *Nat Genet.* 2012;44(9):1040-1045.
2. Sasaki Y, Margolin Z, Borgo B, Havranek JJ, Milbrandt J. Characterization of Leber Congenital Amaurosis-associated NMNAT1 Mutants. *J Biol Chem.* 2015;290(28):17228-17238.
3. Perrault I, Hanein S, Zanlonghi X, et al. Mutations in NMNAT1 cause Leber congenital amaurosis with early-onset severe macular and optic atrophy. *Nat Genet.* 2012;44(9):975-977.
4. Li S, Huang L, Xiao X, Jia X, Guo X, Zhang Q. Identification of CNGA3 mutations in 46 families: common cause of achromatopsia and cone-rod dystrophies in Chinese patients. *JAMA Ophthalmol.* 2014;132(9):1076-1083.
5. Wissinger B, Gamer D, Jagle H, et al. CNGA3 mutations in hereditary cone photoreceptor disorders. *Am J Hum Genet.* 2001;69(4):722-737.
6. Ding XQ, Fitzgerald JB, Quiambao AB, Harry CS, Malykhina AP. Molecular pathogenesis of achromatopsia associated with mutations in the cone cyclic nucleotide-gated channel CNGA3 subunit. *Adv Exp Med Biol.* 2010;664:245-253.
7. Huang L, Xiao X, Li S, et al. Molecular genetics of cone-rod dystrophy in Chinese patients: New data from 61 probands and mutation overview of 163 probands. *Exp Eye Res.* 2016;146:252-258.
8. Lam K, Guo H, Wilson GA, Kohl S, Wong F. Identification of variants in CNGA3 as cause for achromatopsia by exome sequencing of a single patient. *Arch Ophthalmol.* 2011;129(9):1212-1217.
9. Liu C, Varnum MD. Functional consequences of progressive cone dystrophy-associated mutations in the human cone photoreceptor cyclic nucleotide-gated channel CNGA3 subunit. *Am J Physiol Cell Physiol.* 2005;289(1):C187-198.
10. Lopez-Rodriguez A, Holmgren M. Restoration of proper trafficking to the cell surface for membrane proteins harboring cysteine mutations. *PLoS One.* 2012;7(10):e47693.
11. Han J, Rim JH, Hwang IS, et al. Diagnostic application of clinical exome sequencing in Leber congenital amaurosis. *Mol Vis.* 2017;20(23):649-659.



**eTable 5.** The Clinical Features of Patients With Infantile Nystagmus Syndrome With Only 1 Putative Pathogenic Variant or Unsolved Cases

| Patient No. | Initial Diagnosis | Putative pathogenic variant            | Sex | Age <sup>a</sup> (years) | Nystagmus | Refraction |        | BCVA | Fundus                                               | Oculo Digital sign | ERG          | Additional phenotype  |
|-------------|-------------------|----------------------------------------|-----|--------------------------|-----------|------------|--------|------|------------------------------------------------------|--------------------|--------------|-----------------------|
|             |                   |                                        |     |                          |           | RE         | LE     |      |                                                      |                    |              |                       |
| 33          | LCA               | <i>NMNAT1</i><br>c.709C>T              | M   | 1.9                      | HJ        | +6.75      | +5.00  | NA   | Atrophic macula                                      | Y                  | extinguished | N                     |
| 34          | LCA               | <i>RPGRIP1</i><br>c.3565_3517del       | F   | 1.25                     | Roving    | +6.25      | +6.25  | NA   | Slight pale disc                                     | N                  | extinguished | encephalomalacia      |
| 35          | LCA               | <i>CEP290</i><br>c.4661_4663delA<br>AG | F   | 1.6                      | HP        | +4.25      | +4.25  | NA   | Grossly normal                                       | N                  | extinguished | N                     |
| 36          | IIN               | None                                   | M   | 5.6                      | HP        | +0.575     | +0.575 | 0.05 | Optic atrophy<br>Abnormal arcade vessel              | N                  | NA           | N                     |
| 37          | IIN               | None                                   | F   | 8.8                      | HP        | +2.00      | +2.00  | 0.5  | Grossly normal                                       | N                  | NA           | N                     |
| 38          | IIN               | None                                   | F   | 16.3                     | HP        | -4.00      | -4.00  | 0.2  | Grossly normal                                       | N                  | NA           | N                     |
| 39          | LCA               | None                                   | M   | 40.1                     | HJ        | 0          | 0      | 0.02 | Chorioretinal atrophy                                | N                  | extinguished | Congenital cataract   |
| 40          | OA                | None                                   | M   | 19.4                     | HP        | +1.75      | +2.25  | 0.2  | Absence of foveal reflex,<br>mild depigmented retina | N                  | NA           | N                     |
| 41          | IIN               | None                                   | M   | 18.9                     | HP        | -6.75      | -6.75  | 0.1  | Pigmentary retinopathy around macular                | N                  | extinguished | N                     |
| 42          | LCA               | None                                   | M   | 3.6                      | Roving    | +9.00      | +9.00  | NA   | Pigmentary changes with mottling RPE                 | N                  | extinguished | MRI: Molar tooth sign |

|    |      |                         |   |      |        |       |       |     |                                         |   |              |                     |
|----|------|-------------------------|---|------|--------|-------|-------|-----|-----------------------------------------|---|--------------|---------------------|
| 43 | PAX6 | <i>None</i>             | F | 0.6  | Roving | NA    | NA    | NA  | Absence of foveal reflex                | N | NA           | N                   |
| 44 | LCA  | <i>None</i>             | M | 3.6  | Roving | +1.00 | +1.00 | NA  | Pigmentary retinopathy<br>Optic atrophy | N | extinguished | Cerebellar atrophy  |
| 45 | LCA  | <i>ACO2 c.250C&gt;T</i> | M | 2.8  | Roving | -1.25 | -2.25 | NA  | Optic atrophy<br>Grayish fundus         | N | extinguished | Cerebellar atrophy  |
| 46 | IIN  | <i>None</i>             | M | 19.4 | HP     | -5.50 | -2.75 | 0.3 | Grossly normal                          | N | NA           | N                   |
| 47 | LCA  | <i>None</i>             | M | 1    | Rotary | +4.50 | +4.50 | NA  | Atrophic macula                         | N | extinguished | Delayed development |
| 48 | IIN  | <i>None</i>             | F | 31.9 | HJ     | -8.25 | -7.00 | 0.5 | Grossly normal                          | N | NA           | N                   |

Abbreviations: BCVA, best-corrected visual acuity; ERG, electroretinography; F, female; HJ, horizontal jerk; HP, horizontal pendular; IIN, idiopathic infantile nystagmus; LCA, Leber congenital amaurosis; LE, left eye; M, male; N, no; NA, not available; OA, ocular albinism; RE, right eye, RPE, retinal pigment epithelium; Y, yes  
<sup>a</sup>Age represents ages at last visit.

All variants were heterozygous, and all genes described in this table were known to be inherited as autosomal recessive.

P33 and P34 were previously reported. (Reference 1)

### References for eTable5.

1. Han J, Rim JH, Hwang IS, et al. Diagnostic application of clinical exome sequencing in Leber congenital amaurosis. *Mol Vis.* 2017;20(23):649-659.

## **eAppendix. Annotation, Interpretation of Variants, Phenotype Review, and Consensus Discussion**

First (step 1), variants were filtered by their frequencies in population control databases, including Exome Aggregation Consortium (non-TCGA dataset; frequencies were calculated according to ethnic subgroups), ESP6500, 1000 Genomes Project, and Korean Reference Genome DataBase. To maximize the diagnostic yield, variants with a minor allele frequency greater than 5% in any of the population subgroups rather than conventional 1% criteria were classified as absolutely benign, whereas those that were absent from the general population were considered to have moderate evidence as pathogenic. Secondly (step 2), literature and database searches for previous reports and functional studies were performed using the RetNet database, the Alamut Visual software and Human Gene Mutation Database professional database. Pathogenic or benign evidence was scored when predictions of all *in silico* algorithms agreed. Finally, the last step involved genetic specialists or laboratory physicians presenting a preliminary report to the patient's attending physicians or pediatric ophthalmologists, which listed all possible pathogenic variants, likely pathogenic variants, and variants of unknown significance (VUSs). When pathogenic or likely pathogenic variants were consistent with the patient's phenotype based on in-depth review by ophthalmologists, final validation using other confirmatory assays and a parental study was planned if available. VUSs, especially missense variants, were prioritized according to population frequency, American College of Medical Genetics score, and the patient's ocular phenotype. A parental study was scheduled to detect de novo occurrence for the candidate pathogenic or likely pathogenic variants, and VUSs in all available trios.

### **Systematic approaches for variant classification**

Variant classification followed a three-step approach. First, conventional bioinformatics analysis found 16 variants in 15 patients that were classified as likely pathogenic based on the nature of the mutation (mostly null variants) and frequencies in the normal populations. No variant could be classified as definitely pathogenic during the first step. In the second step, extensive literature reviews and database searches were conducted for the variant and other variants in the same amino acid position. When combined with *in silico* analysis, 13 additional variants could be classified as likely pathogenic mutations and 5 variants previously classified as likely pathogenic after the first step were re-classified as pathogenic mutations during the second step. Diagnostic yield, which was calculated as the proportion of solved patients with sufficient pathogenic or likely pathogenic mutations among the 48 patients, increased from 14.9% to 25.5% during the second step. The third step included genotype-phenotype correlations, consensus discussion among geneticists and clinicians, family study and segregation results, and additional confirmatory assays. Finally, 24 variants could be identified as likely pathogenic and 19 variants identified as pathogenic in a total of 32 patients. The final diagnostic yield reached 66.7%.

**eFigure 1.** Schematic Diagram of Next-Generation Sequencing Analysis Work Flow

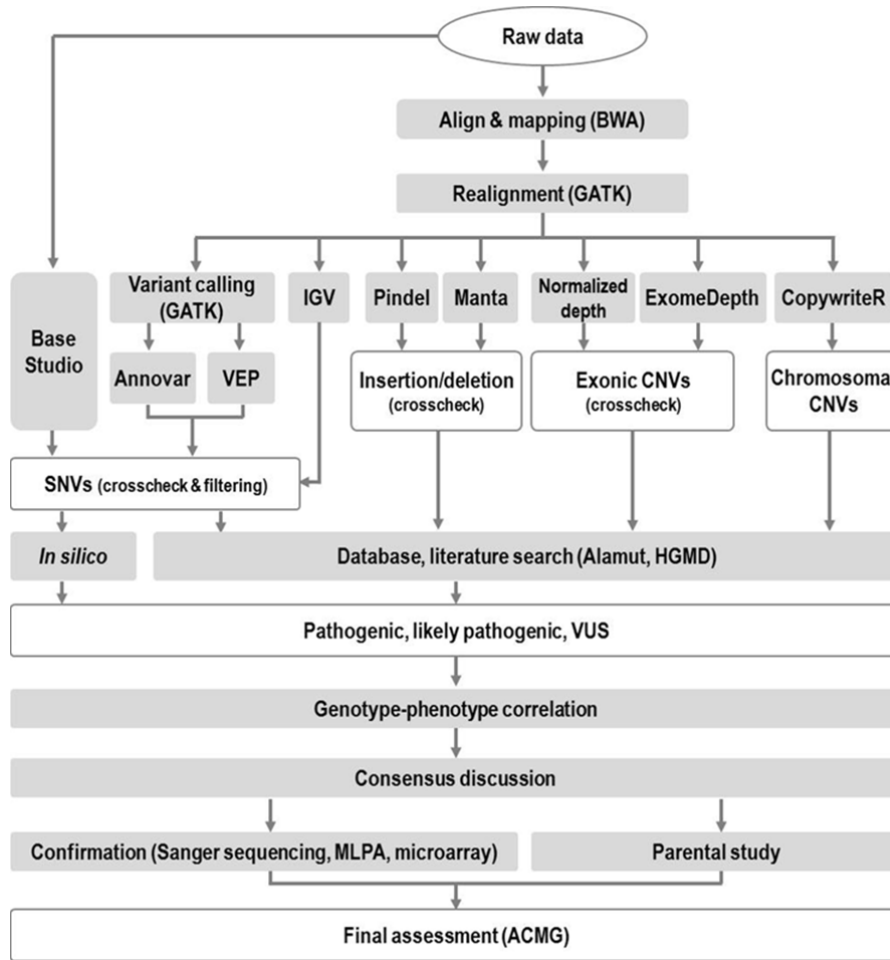

**eFigure 2.** Pedigree of 8 Patients Who Had Family History of Nystagmus

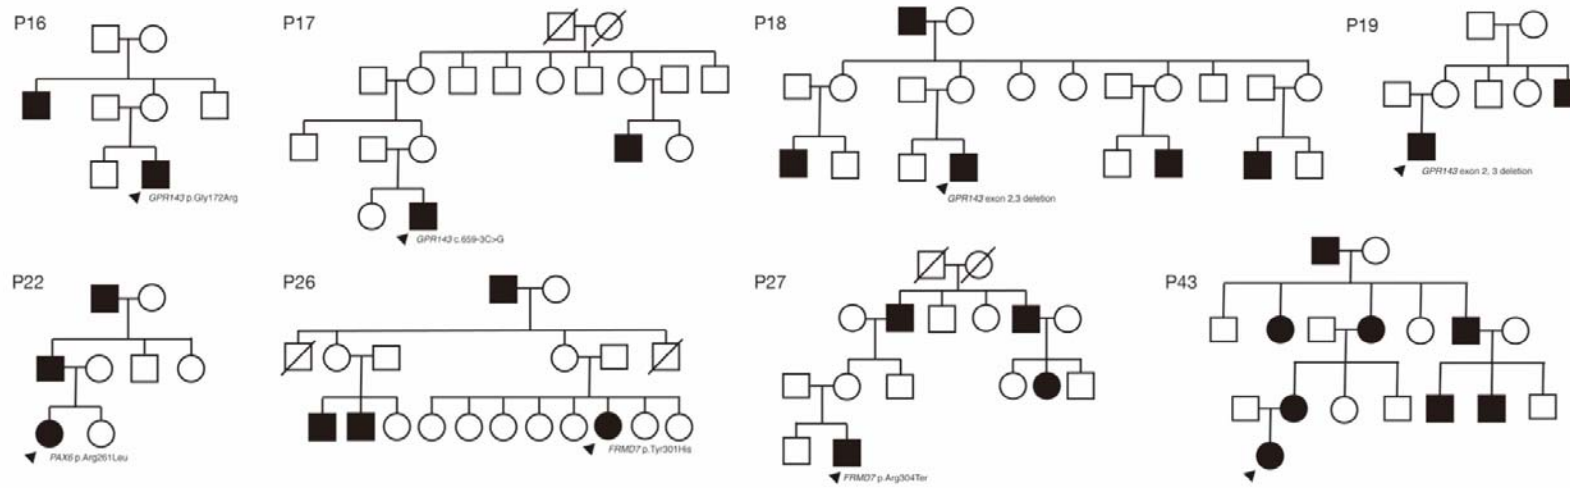

Targeted next-generation sequencing identified pathogenic or likely pathogenic variants in all patients except P43 with family history of aniridia.

**eFigure 3.** The Distribution of Age at the Time of Referral for Genetic Testing

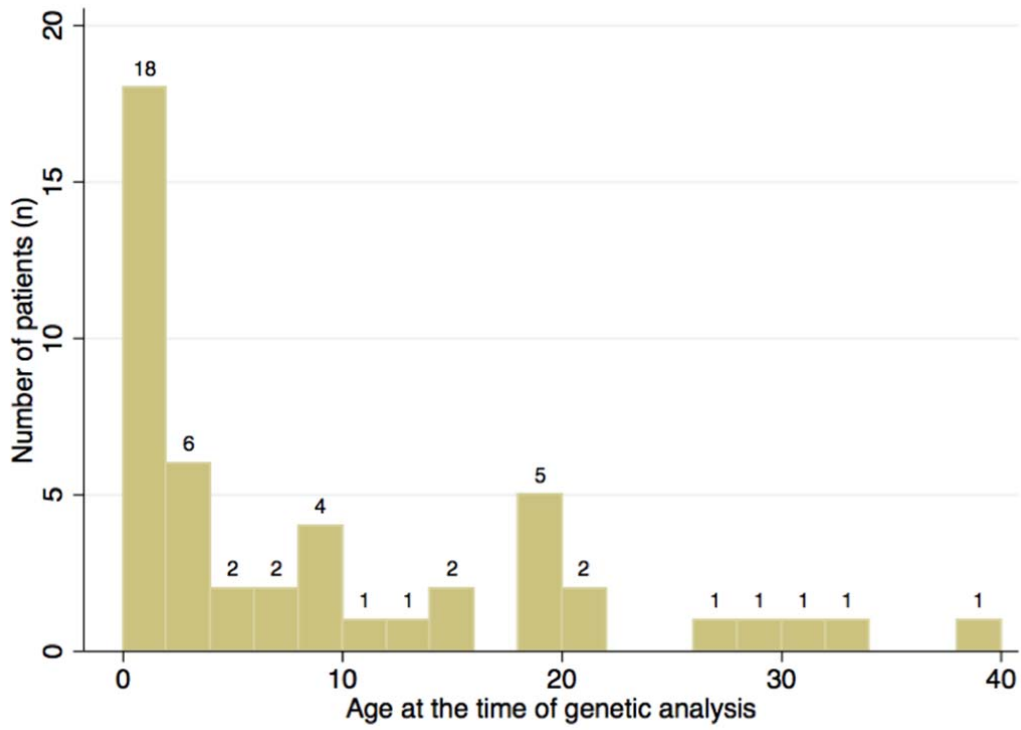

**eFigure 4.** Wide-Field Fundus Photograph and Optical Coherence Tomography in a Patient With *RPGRIP1* Mutations

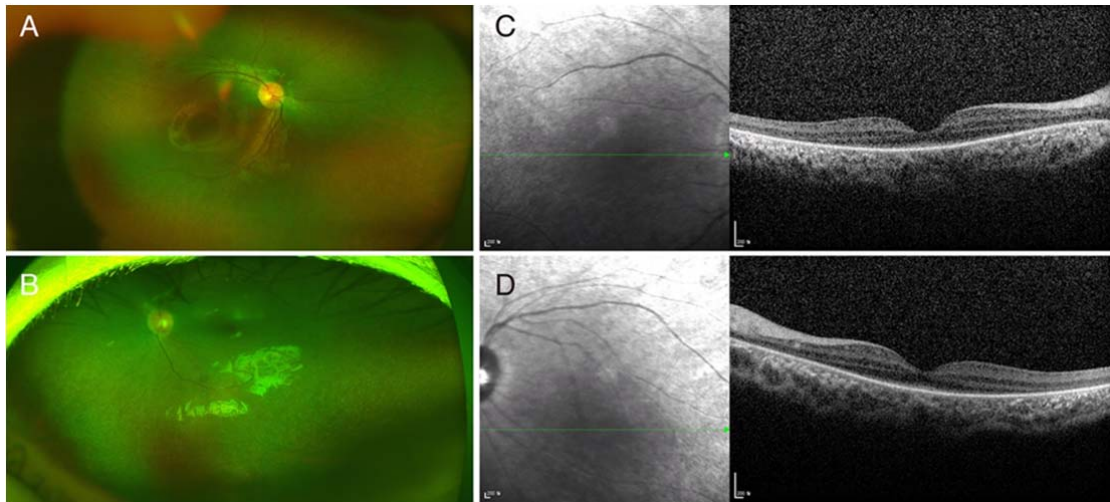

(P9) (A, B) Pigmentary retinopathy was seen in a patient with p.Arg768Ter and p.Arg1189GlyfsTer7 *RPGRIP1* mutations. (C, D) Diffuse loss of photoreceptor layers was noted in optical coherence tomography

**eFigure 5.** Fundus Photograph and Optical Coherence Tomography in a Patient With *CRB1*

Mutations

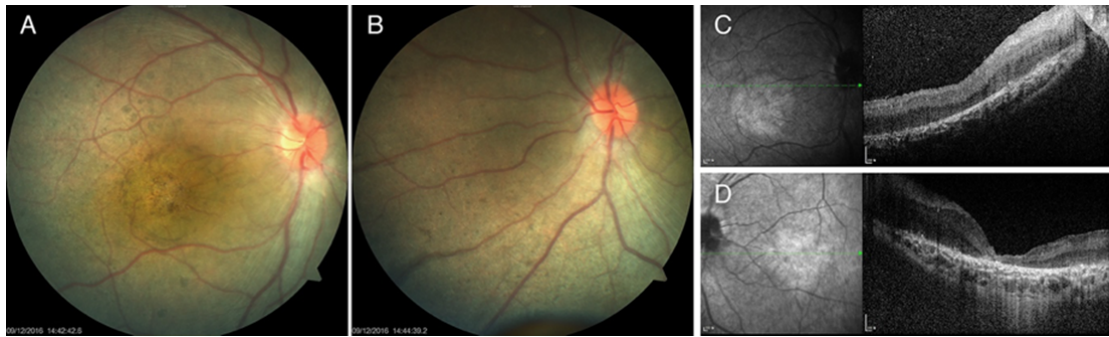

(P13) 1 year old male came to our clinic for the evaluation of nystagmus. Patient exhibited 2Hz pendular nystagmus bilateral symmetric. He could fix and follow objects. Presumed clinical diagnosis of idiopathic infantile nystagmus was made on the basis of clinical findings. At the age of 4 years, parents reported that he had poked his eyes 1 years ago. Electroretinography showed extinguished ERG in both scotopic and photopic responses. Next-generation sequencing revealed compound heterozygous p.Ser403Ter/p.Arg526Ter *CRB1* mutations. (A, B) Granular pigmentary retinopathy was noted in both eyes. (C, D) Optical coherence tomography showed retinal thickening with loss of photoreceptor layers in both eyes.



**eFigure 6.** Fundus Photograph, Optical Coherence Tomography, Ultrasonography of the Kidney, and Abdominal Computed Tomography in a Patient With Senior-Loken Syndrome Caused by Homozygous p.Arg1178Glu *WDR19* Mutation

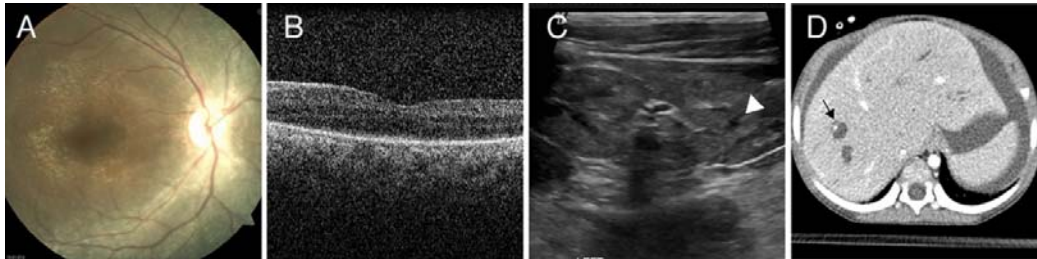

(P15) (A) Fundus photographs revealing pigmentary retinopathy. (B) Diffuse loss of photoreceptor layer was noted in optical coherence tomography. (C) Ultrasonography revealed increased parenchymal echogenicity and poor corticomedullary differentiation of both kidneys and cystic changes (arrowhead), which is suggestive of nephronophthisis. (D) Multifocal dilatation of intrahepatic bile ducts in both lobes of the liver (arrow), without significant common bile duct dilatation.

**eFigure 7.** Phenotypic Variability of 4 Patients With *GPR143* Mutations

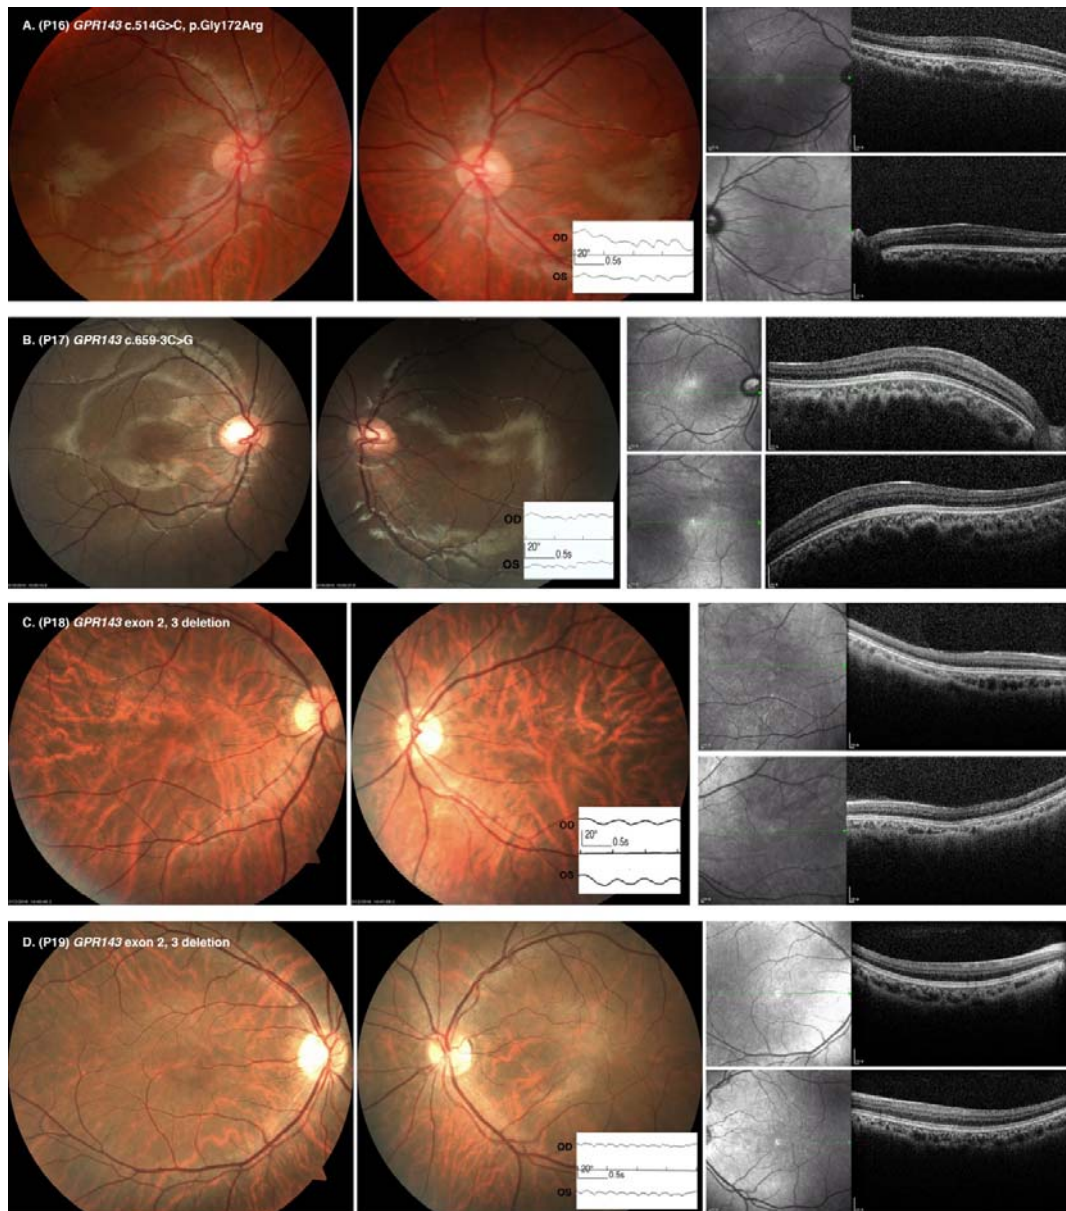

All patients had grade 4 foveal hypoplasia. (A) P16 had a missense mutation of *GPR143* c.514G→C, p.Gly172Arg. Depigmented fundi was noted, and 4 Hz pendular nystagmus was apparent. (B) P17 had a non-canonical splice site mutation of *GPR143* c.659-3C→G. *GPR143* c.659-3C→G mutation has not been previously reported in the literature; however, *in silico* predictions suggest that it introduces a strong 3' splice acceptor site before the canonical 3' splicing site of exon 5. Ocular pigmentation was normal in this patient. (C, D). *GPR143* exon 2, 3 deletion were found in P18 and P19. Depigmented retina was more severe in P18 than in P19. P18 had 2 Hz pendular nystagmus, but P19 had 4-5 Hz pseudocycloid nystagmus.



**eFigure 9.** Fundus Photographs and Optical Coherence Tomography in 4 Patients With *PAX6* Mutations

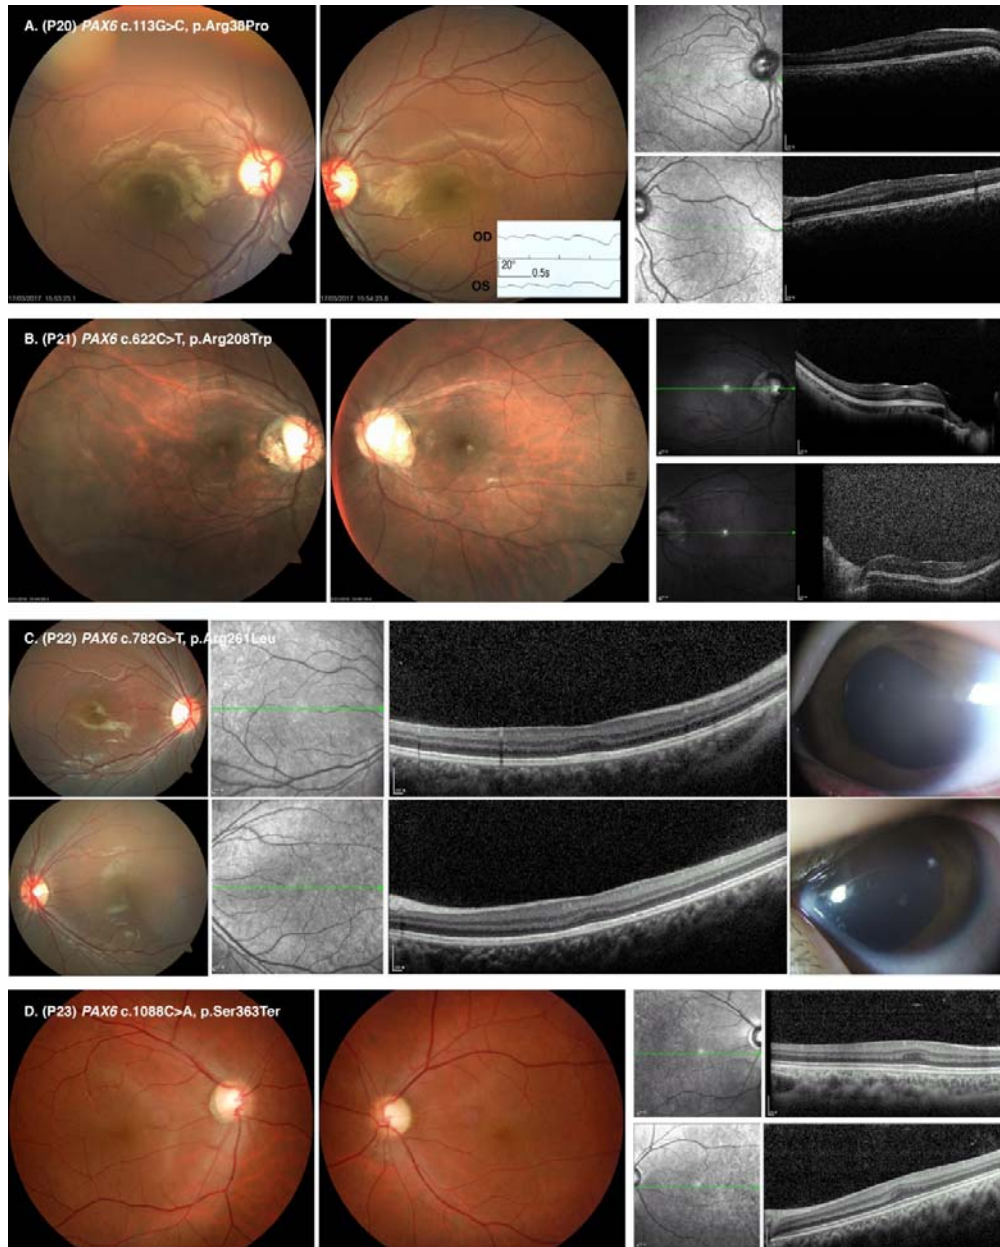

(A) p.Arg38Pro *PAX6* mutation was identified in P20. Optical coherence tomography (OCT) revealed grade 2 foveal hypoplasia. Posterior subcapsular cataract was noted in this patient. (B) 26-year-old male visited the clinic for genetic testing for nystagmus. He underwent cataract surgery due to presenile cataract at the age of 24 years. Iris structure was normal in this patient. Grade 1 foveal hypoplasia was noted in OCT. (C) 8-year-old girl had nystagmus and grade 3 foveal hypoplasia. p.Arg261Leu *PAX6* mutation was detected in targeted next-generation sequencing. (D) Novel nonsense p.Ser363Ter *PAX6* mutation was identified in P23. Horizontal pendular nystagmus was noted. This patient had grade 3 foveal hypoplasia and normal iris structure without presenile cataract.

**eFigure 10.** Fundus Photograph and Electroretinography in a Patient With *CACNA1F* Mutation

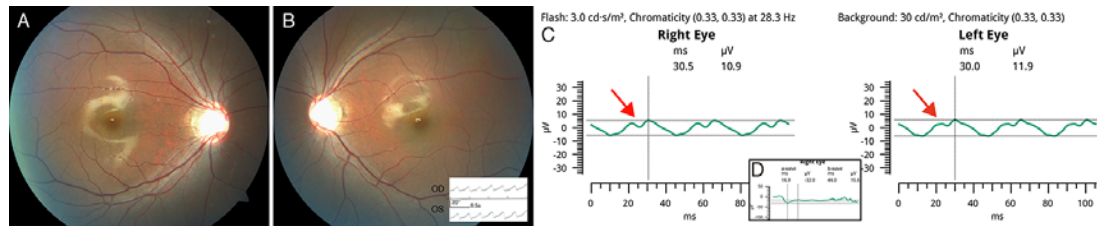

(P28) A 1.5 year-old boy came to our clinic for the evaluation nystagmus. Ocular motility examination showed 2Hz right-left alternating jerk nystagmus. (A, B) Fundus examination showed high cup disc ratio. Cycloplegic refraction showed mild myopia at the age of 1.5 years. At the age of 5 years, best corrective visual acuity was 20/100 in both eyes and myopia progressed to moderate myopia. Optical coherence tomography showed normal retinal lamellar structures at fovea. Targeted next-generation sequencing revealed a hemizygous c.342delC, p.Phe114SerTer22 *CACNA1F* mutation. (C, D) Electroretinography (ERG) showed negative ERG in dark-adapted 3.0 ERG and “double peak” sign in light-adapted 3.0 flicker.
